# Supplementary material for: Biomarkers of pembrolizumab efficacy in advanced anal squamous cell carcinoma: analysis of a phase II clinical trial and a cohort of long-term responders
Source: PubMed Central journal article supplement — J Immunother Cancer. 2024 Jan 25;12(1):e008436. doi: 10.1136/jitc-2023-008436 (PMC10824013; doi:10.1136/jitc-2023-008436), 2024-01-25
Supplement: jitc-2023-008436supp001.pdf [file jitc-2023-008436supp001.pdf]

**Supplementary Tables**

Supplementary Table 1: Objective response rate in metastatic anal cancer by RECIST v1.1

Supplementary Table 2: Number of Tumors Analyzed by DFCI Immunoprofile According to Cancer Type

Supplementary Table 3: HPV status by tumor tissue and peripheral blood

Supplementary Table 4: Demographic table of patients exposed to PD1 inhibition at Dana-Farber Cancer Institute (Retrospective Cohort)

**Supplementary Table 1: Objective response rate in metastatic anal cancer by RECIST v1.1**

| <b>Confirmed objective response</b> | <b>Pembrolizumab (n) (N=32)</b>  |
|-------------------------------------|----------------------------------|
| Complete response                   | 3.1% (95% CI: 0.1–16.2) (n=1)    |
| Partial response                    | 6.3% (95% CI: 0.7–20.8%) (n=2)   |
| Stable disease                      | 31.2% (95% CI: 16.1-50.0) (n=10) |
| Progressive disease                 | 43.8% (95% CI: 26.4-62.3) (n=14) |
| Inevaluable                         | 15.6% (95% CI: 5.3-32.8) (n=5)   |
| ORR (PR + CR)                       | 9.4% (95% CI: 2.0–25.0) (n=3)    |

**Supplementary Table 2: Number of Tumors Analyzed by DFCI Immunoprofile According to Cancer Type**

| <b>DFCI Immunoprofile by Cancer Type</b>                                    |                |
|-----------------------------------------------------------------------------|----------------|
| <b>Cancer Type</b>                                                          | <b>Total N</b> |
| Lung Cancer                                                                 | 347            |
| Colorectal Cancer                                                           | 140            |
| Bladder Cancer                                                              | 110            |
| Breast Cancer                                                               | 101            |
| Endometrial Cancer                                                          | 71             |
| Head & Neck Cancer                                                          | 71             |
| Melanoma                                                                    | 69             |
| Renal Cancer                                                                | 57             |
| Gastroesophageal Adenocarcinoma                                             | 50             |
| Ovarian Cancer                                                              | 50             |
| Pancreatic Cancer                                                           | 37             |
| Anal Cancer*                                                                | 24             |
| Biliary Tract Cancer                                                        | 15             |
| Cervical Cancer                                                             | 5              |
| Prostate Cancer                                                             | 5              |
| * All of the anal cancer patients included were part of the clinical trial. |                |

**Supplementary Table 3: HPV status by tumor tissue and peripheral blood**

| Patient ID | P16/PCR result   | Baseline TTMV-HPV DNA | HPV status determination |
|------------|------------------|-----------------------|--------------------------|
| 1          | Genotype 16      | 67544                 | Positive                 |
| 2          | p16 positive     | 590000                | Positive                 |
| 3          | ISH/p16 positive | 2462500               | Positive                 |
| 4          | unknown          | 16818                 | Positive                 |
| 5          | p16 positive     | 1317                  | Positive                 |
| 6          | PCR positive     | 238889                | Positive                 |
| 7          | p16 positive     | 20417                 | Positive                 |
| 8          | p16 positive     | 45076                 | Positive                 |
| 9          | unknown          | Unknown               | Unknown                  |
| 10         | p16 positive     | 141111                | Positive                 |
| 11         | unknown          | 0                     | Negative                 |
| 12         | p16 positive     | 4387                  | Positive                 |
| 13         | p16 positive     | 1483333               | Positive                 |
| 14         | unknown          | 116                   | Positive                 |
| 15         | ISH/p16 positive | 4                     | Positive                 |
| 16         | unknown          | 117750                | Positive                 |
| 17         | NEGATIVE         | 0                     | Negative                 |
| 18         | p16 positive     | 0                     | Undetermined             |
| 19         | ISH/p16 positive | 92                    | Positive                 |
| 20         | ISH/p16 positive | 155                   | Positive                 |
| 21         | ISH/p16 positive | 20000                 | Positive                 |
| 22         | p16 positive     | 731250                | Positive                 |
| 23         | unknown          | 170052                | Positive                 |
| 24         | NEGATIVE         | 0                     | Negative                 |
| 25         | p16 positive     | 6133                  | Positive                 |
| 26         | p16 positive     | 35046                 | Positive                 |
| 27         | p16 positive     | Unknown               | Positive                 |
| 28         | p16 positive     | 533                   | Positive                 |
| 29         | p16 positive     | Unknown               | Positive                 |
| 30         | unknown          | 10258                 | Positive                 |
| 31         | Genotype 16      | 211                   | Positive                 |
| 32         | unknown          | 2000                  | Positive                 |

ID: identification. ISH: in-situ hybridization. PCR: polymerase chain reaction. HPV: human papillomavirus. TTMV-HPV DNA: tumor tissue modified-HPV DNA.

**Supplementary Table 4: Demographic table of patients exposed to PD1 inhibition at Dana-Farber Cancer Institute (Retrospective Cohort)**

|                                                |                      | <b>n=18 (%)</b> |
|------------------------------------------------|----------------------|-----------------|
| <b>Median Age (years)</b>                      |                      | 57              |
|                                                | <b>Range (years)</b> | 37-80           |
| <b>Gender</b>                                  |                      |                 |
|                                                | Male                 | 5 (28)          |
|                                                | Female               | 13 (72)         |
| <b>Race</b>                                    |                      |                 |
|                                                | White                | 18 (100)        |
| <b>Smoking Status</b>                          |                      |                 |
|                                                | Never                | 4 (22)          |
|                                                | Former               | 12 (67)         |
|                                                | Current              | 2 (11)          |
| <b>HIV status</b>                              |                      |                 |
|                                                | Positive             | 1 (6)           |
|                                                | Negative             | 17 (94)         |
| <b>Pathologic differentiation</b>              |                      |                 |
|                                                | Well                 | 0 (0)           |
|                                                | Moderate             | 8 (44)          |
|                                                | Poor                 | 5 (28)          |
|                                                | Not specified        | 5 (28)          |
| <b>HPV status</b>                              |                      |                 |
|                                                | Positive             | 14 (78)         |
|                                                | Negative             | 1 (6)           |
|                                                | Not tested           | 3 (17)          |
| <b>Clinical T stage at diagnosis</b>           |                      |                 |
|                                                | T1                   | 0 (0)           |
|                                                | T2                   | 3 (17)          |
|                                                | T3                   | 4 (22)          |
|                                                | T4                   | 2 (11)          |
|                                                | Not specified        | 9 (50)          |
| <b>Clinical node status at diagnosis</b>       |                      |                 |
|                                                | N0                   | 2 (11)          |
|                                                | N+                   | 9 (50)          |
|                                                | Not specified        | 7 (39)          |
| <b>M stage at diagnosis</b>                    |                      |                 |
|                                                | M0                   | 11 (61)         |
|                                                | M1                   | 7 (39)          |
| <b>Initial treatment for localized disease</b> |                      |                 |
|                                                | Chemoradiation       | 11 (61)         |
|                                                | Excision             | 0 (0)           |
| <b>Response to chemoradiation</b>              |                      |                 |
|                                                | Complete Response    | 7 (39)          |
|                                                | Incomplete Response  | 4 (22)          |

|                                                       |         |
|-------------------------------------------------------|---------|
| <b>First line therapy in metastatic setting</b>       |         |
| Cisplatin/5-fluorouracil (5-FU)                       | 7 (39)  |
| Carboplatin/paclitaxel                                | 3 (17)  |
| Folinic acid, 5-FU, oxaliplatin                       | 1 (6)   |
| Pembrolizumab                                         | 4 (22)  |
| Nivolumab                                             | 2 (11)  |
| Other                                                 | 1 (6)   |
| <b>PD1 directed therapy</b>                           |         |
| Pembrolizumab monotherapy                             | 10 (55) |
| Nivolumab monotherapy                                 | 7 (39)  |
| Chemotherapy + nivolumab                              | 1 (6)   |
| <b>Site of metastases at time of anti-PD1 therapy</b> |         |
| Liver                                                 | 5 (28)  |
| Lung                                                  | 10 (55) |
| Distant lymph nodes                                   | 11 (61) |
| Other                                                 | 5 (28)  |
