# Supplementary material for: Biomarkers of pembrolizumab efficacy in advanced anal squamous cell carcinoma: analysis of a phase II clinical trial and a cohort of long-term responders
Source: PubMed Central journal article supplement — J Immunother Cancer. 2024 Jan 25;12(1):e008436. doi: 10.1136/jitc-2023-008436 (PMC10824013; doi:10.1136/jitc-2023-008436), 2024-01-25
Supplement: jitc-2023-008436supp003.pdf [file jitc-2023-008436supp003.pdf]

**Supplement Methods:****Flow cytometry**

Pretreatment and on-treatment PBMC samples were analyzed by flow cytometry at Dana-Farber Cancer Institute. Samples were thawed at 37°C then rapidly washed. The following fluorochrome-conjugated monoclonal antibodies were used in multi-color flow cytometry to identify and characterize T lymphocytes: anti-CD4 (BV510) from BD Biosciences; anti-CXCR5 (PE), anti-PD-1 (PE-Dazzle594), anti-ICOS (PerCP/Cy5.5), anti-CD45RA (FITC), anti-CD45RO (BV650), anti-CD8 (PacBlue), anti-HLA-DR (BV570), anti-CD38 (BV711), anti-CX3CR1 (BV421), anti-CD137 (PE/Cy7), and anti-CD16 (BV785) from BioLegend. Dead cells were identified by using NIR from BioLegend. Anti-CD19 (BV605), anti-CD14 (BV605), and anti-CD15 (BV605) from BioLegend were used as a dump gate. The following fluorochrome-conjugated monoclonal antibodies were used in multi-color flow cytometry to identify and characterize B lymphocytes: anti-PD-L1 (BV650), anti-CD19 (BV711), anti-CD20 (FITC), anti-CD21 (PE), anti-IgD (BV421), anti-CD71 (PerCP/Cy5.5), anti-CD27 (PacBlue), anti-CD38 (PE/Cy7), and anti-CD10 (PE/Dazzle594) from BioLegend. Dead cells were identified by using NIR from BioLegend. Anti-CD3 (BV785), anti-CD14 (BV785), and anti-CD16 (BV785) from BioLegend were used as a dump gate. All stained samples were acquired with a flow cytometer (Sony) and analyzed using FlowJo software (Tree Star, OR, USA).

**Enzyme-linked immunosorbent assay**

Plasma samples were analyzed for presence or absence of E6 HPV antibody by enzyme-linked immunosorbent assay (ELISA). High-binding assay plates (Corning 9018) were coated with coating buffer (20% ELISA Coating Buffer [BioLegend] in PBS). Plates were allowed to coat overnight at 4°C. Plates were subsequently washed with wash buffer (1:2,000 dilution of Tween in PBS) and blocked with assay diluent (20% Assay Diluent A [BioLegend] in PBS) for 1 hour (h) at room temperature (RT). Plates were washed again with wash buffer before addition of 100 µl of samples, diluted at 1:10. Plates were incubated for two hours at RT and then washed with wash buffer. 100 µl of secondary antibody (1:5,000 in assay diluent) was added to all wells (IgG [Southern Biotech 204005]) and incubated for 1 h at RT. After washing with wash buffer, 50 µl of tetramethylbenzidine (Sigma-T8665) was added and incubated

for 3-10 min at RT; then, 50  $\mu$ l of 1 M hydrochloric acid was added to stop the reaction. Optical density values were read as a measure of concentration at 450 nm on a plate reader.

### **Assessment of PDL1 Expression**

Pretreatment tumor biopsies were collected prior to study drug initiation. An archived formalin-fixed, paraffin-embedded tumor sample or a newly obtained biopsy specimen (n=27 with tumor tissue present) was assessed at a central laboratory for PDL1 expression at screening with a laboratory-developed prototype immunohistochemistry assay (QualTek Molecular Laboratories, Goleta, CA) using the 22C3 antibody (Merck & Co., Inc., Kenilworth, NJ). PDL1 positivity was defined as membrane staining of >1% of scorable cells, including both neoplastic cells and contiguous mononuclear inflammatory cells, or the presence of a distinctive interface pattern. Combined Positive Score (CPS) was defined as overall % positive cells expressing PDL1.

Supplement Table: Flow Cytometry Antibodies

| <b>T cell antibodies</b> |                     |              |              |
|--------------------------|---------------------|--------------|--------------|
| <b>Marker</b>            | <b>Manufacturer</b> | <b>Cat #</b> | <b>Clone</b> |
| CD4 (BV510)              | BD Biosciences      | BDB562970    | SK3          |
| CXCR5 (PE)               | Biolegend           | 356904       | J252D4       |
| PD-1 (PE-Dazzle594)      | Biolegend           | 367434       | NAT105       |
| ICOS (PerCP/Cy5.5)       | Biolegend           | 313518       | C398.4A      |
| CD45RA (FITC)            | Biolegend           | 304148       | HI100        |
| CD45RO (BV650)           | Biolegend           | 304232       | UCHL1        |
| CD8 (PacBlue)            | Biolegend           | 344718       | SK1          |
| HLA-DR (BV570)           | Biolegend           | 307638       | L243         |
| CD38 (BV711)             | Biolegend           | 303528       | HIT2         |
| CX3CR1 (BV421)           | Biolegend           | 341620       | 2A9-1        |
| CD137 (PE/Cy7)           | Biolegend           | 309818       | 4B4-1        |
| CD16 (BV785)             | Biolegend           | 302046       | 3G8          |
| CD14 (BV605)             | Biolegend           | 301834       | M5E2         |
| Zombie NIR               | Biolegend           | 423105       | N/A          |
| CD19 (BV605)             | Biolegend           | 302244       | HIB19        |
| CD15 (BV605)             | Biolegend           | 323032       | W6D3         |
| <b>B cell antibodies</b> |                     |              |              |
| <b>Marker</b>            | <b>Manufacturer</b> | <b>Cat #</b> | <b>Clone</b> |
| PD-L1 (BV650)            | Biolegend           | 329740       | 29E.2A3      |
| CD19 (BV711)             | Biolegend           | 302244       | HIB19        |
| CD20 (FITC)              | Biolegend           | 302304       | 2H7          |
| CD21 (PE)                | Biolegend           | 354904       | Bu32         |
| IgD (BV421)              | Biolegend           | 348226       | IA6-2        |
| CD71 (PerCP/Cy5.5)       | Biolegend           | 334114       | CY1G4        |
| CD27 (PacBlue)           | Biolegend           | 356414       | M-T271       |
| CD38 (PE/Cy7)            | Biolegend           | 356608       | HB-7         |
| CD10 (PE/Dazzle594)      | Biolegend           | 312228       | HI10a        |
| Zombie NIR               | Biolegend           | 423105       | N/A          |
| CD3 (BV785)              | Biolegend           | 317330       | OKT3         |
| CD14 (BV785)             | Biolegend           | 367142       | 63D3         |
| CD16 (BV785)             | Biolegend           | 302046       | 3G8          |
